# Supplementary material
Source: PubMed Central journal article supplement (PMC8206167)
Supplement: mmc1.pdf [file mmc1.pdf]

## Supplemental information

**Variants in the degron of AFF3 are associated with  
intellectual disability, mesomelic dysplasia,  
horseshoe kidney, and epileptic encephalopathy**

**Norine Voisin, Rhonda E. Schnur, Sofia Douzgou, Susan M. Hiatt, Cecilie F. Rustad, Natasha J. Brown, Dawn L. Earl, Boris Keren, Olga Levchenko, Sinje Geuer, Sarah Verheyen, Diana Johnson, Yuri A. Zarate, Miroslava Hancárová, David J. Amor, E. Martina Bebin, Jasmin Blatterer, Alfredo Brusco, Gerarda Cappuccio, Joel Charrow, Nicolas Chatron, Gregory M. Cooper, Thomas Courtin, Elena Dadali, Julien Delafontaine, Ennio Del Giudice, Martine Doco, Ganka Douglas, Astrid Eisenkölbl, Tara Funari, Giuliana Giannuzzi, Ursula Gruber-Sedlmayr, Nicolas Guex, Delphine Heron, Øystein L. Holla, Anna C.E. Hurst, Jane Juusola, David Kronn, Alexander Lavrov, Crystle Lee, Séverine Lorrain, Else Merckoll, Anna Mikhaleva, Jennifer Norman, Sylvain Pradervand, Darina Prchalová, Lindsay Rhodes, Victoria R. Sanders, Zdeněk Sedláček, Heidelis A. Seebacher, Elizabeth A. Sellars, Fabio Sirchia, Toshiki Takenouchi, Akemi J. Tanaka, Heidi Taska-Tench, Elin Tønne, Kristian Tveten, Giuseppina Vitiello, Markéta Vlčková, Tomoko Uehara, Caroline Nava, Binnaz Yalcin, Kenjiro Kosaki, Dian Donnai, Stefan Mundlos, Nicola Brunetti-Pierri, Wendy K. Chung, and Alexandre Reymond**

# Figure S1

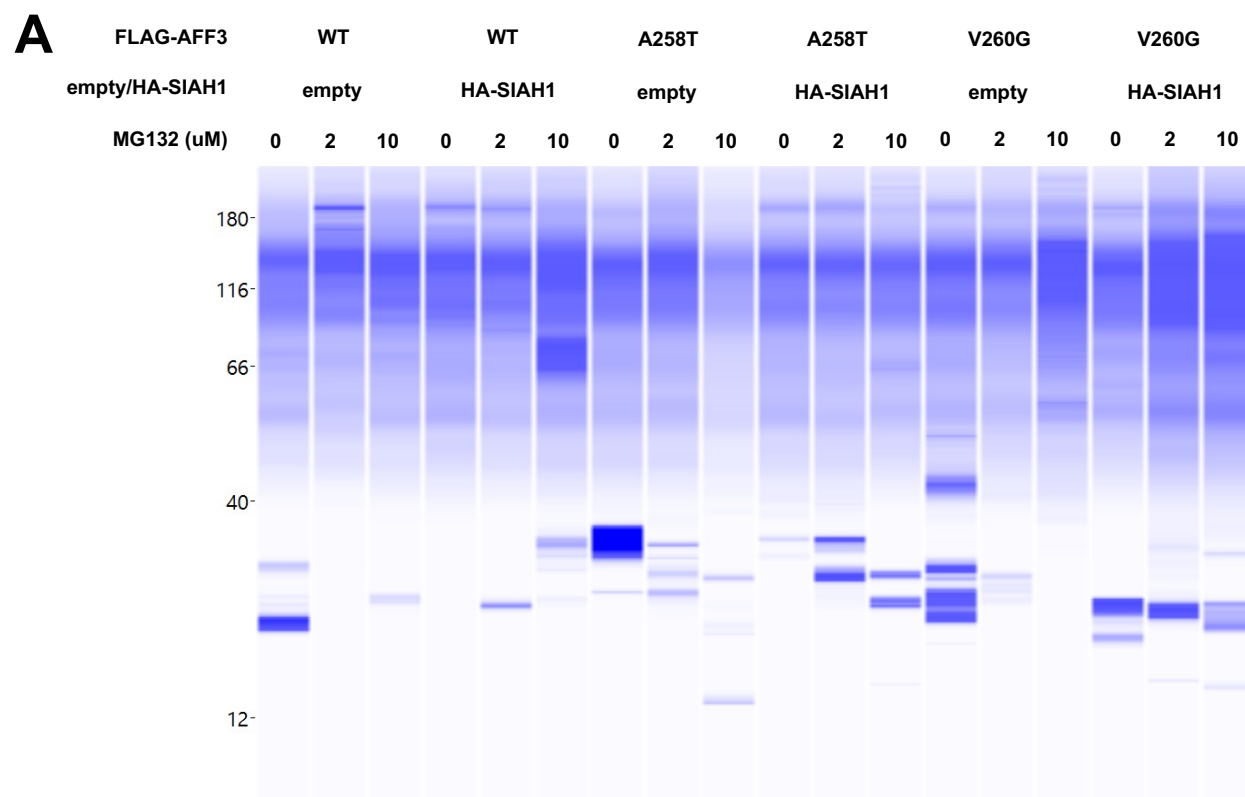

## B

| Sample                        | Primary           | PN (%) |
|-------------------------------|-------------------|--------|
| AFF3 WT + empty               | Flag M2- SLCD3990 | 100    |
| AFF3 WT +empty + MG132 -2     | Flag M2- SLCD3990 | 103    |
| AFF3 WT +empty + MG132 -10    | Flag M2- SLCD3990 | 104    |
| AFF3 WT +SIAH                 | Flag M2- SLCD3990 | 107    |
| AFF3 WT +SIAH + MG132-2       | Flag M2- SLCD3990 | 103    |
| AFF3 WT +SIAH + MG132-10      | Flag M2- SLCD3990 | 117    |
| AFF3 A258T +empty             | Flag M2- SLCD3990 | 104    |
| AFF3 A258T +empty + MG132 -2  | Flag M2- SLCD3990 | 104    |
| AFF3 A258T +empty + MG132 -10 | Flag M2- SLCD3990 | 84     |
| AFF3 A258T +SIAH              | Flag M2- SLCD3990 | 102    |
| AFF3 A258T +SIAH + MG132-2    | Flag M2- SLCD3990 | 101    |
| AFF3 A258T +SIAH + MG132-10   | Flag M2- SLCD3990 | 99     |
| AFF3 V260G +empty             | Flag M2- SLCD3990 | 110    |
| AFF3 V260G +empty + MG132 -2  | Flag M2- SLCD3990 | 100    |
| AFF3 V260G +empty + MG132 -10 | Flag M2- SLCD3990 | 114    |
| AFF3 V260G +SIAH              | Flag M2- SLCD3990 | 103    |
| AFF3 V260G +SIAH + MG132 -2   | Flag M2- SLCD3990 | 122    |
| AFF3 V260G +SIAH + MG132 -10  | Flag M2- SLCD3990 | 124    |

Figure S1: Loading control and normalization of the FLAG immuno-assays presented in Figure 2A. Protein extracts were separated by capillarity on a Jess system and immuno-assayed with an anti-FLAG antibody. (A) Fluorochrome fixation for normalisation of protein extracts of the Jess run. (B) Normalisation values of all samples in percent (PN) using as reference the protein extract FLAG-AFF3 WT and empty vector.

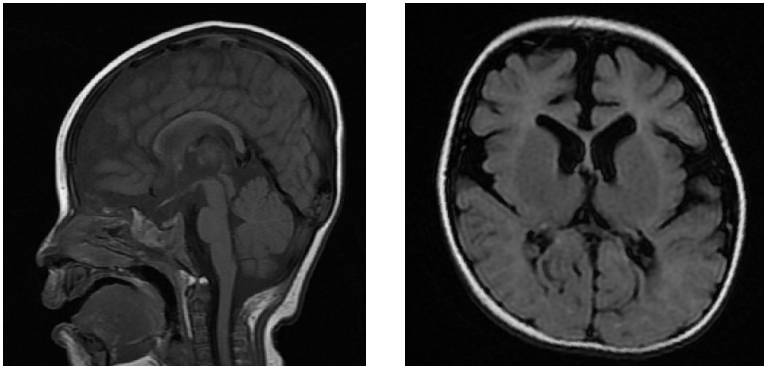

**Figure S2: Brain MRI of proband 11 carrying a *de novo* variant in *AFF3*. FLAIR (right) and T1 (left) at 9 months old are shown.**

Table S2: Phenotypes of Aff3del/del homozygous in-frame truncation (chimeric mice from diploid aggregation with homozygous ES cells)

| phenotype                                          | E18.5   |        | E14.5   |        | E14.5/E18.5 combined |        |
|----------------------------------------------------|---------|--------|---------|--------|----------------------|--------|
|                                                    | numbers | pct[%] | numbers | pct[%] | numbers              | pct[%] |
| polydactyly                                        | 5       | 42     | 1       | 25     | 6                    | 38     |
| mesomelic dyplasia                                 | 12      | 100    | 4       | 100    | 16                   | 100    |
| triangular tibia                                   | 12      | 100    | 4       | 100    | 16                   | 100    |
| hypoplastic fibula                                 | 12      | 100    | 4       | 100    | 16                   | 100    |
| hypoplastic pelvis                                 | 12      | 100    | NA      |        | NA                   |        |
| craniofacial dysmorphism                           | 12      | 100    | 4       | 100    | 16                   | 100    |
| delayed ossification (skull)                       | 12      | 100    | NA      |        | NA                   |        |
| intestinal prolapse                                | 10      | 83     | NA      |        | NA                   |        |
| lack of motoric reflexes /neurological dysfunction | 12      | 100    | NA      |        | NA                   |        |
| reduces body size                                  | 12      | 100    | 4       | 100    | 16                   | 100    |
| abort                                              | 1       | 8      | 0       | 0      | 1                    | 6      |
| total numbers of fetuses (abort excluded)          | 12      | 100    | 4       | 100    | 16                   | 100    |
| total numbers of litters                           | 3       |        | 1       |        | 4                    |        |

motoric reflex = touch triggers contraction in E18.5

NA = not available, not investigated, in case of motoric reflexes not applicable
